# Supplementary material for: Surface coating effects on the sorption and dissolution of ZnO nanoparticles in soil
Source: Royal Society of Chemistry journal article supplement (doi:10.1039/c9en00348g), 2019-01-01
Supplement: c9en00348g1.pdf [file c9en00348g1.pdf]

## Effects of Surface Coating Properties on the Sorption and Dissolution of ZnO Nanoparticles in Soil

Zeinah Elhaj Baddar, Chris J. Matocha<sup>a</sup> and Jason M. Unrine \*

Department of Plant and Soil Sciences, University of Kentucky, Lexington, Kentucky 40546, United States. Email: [jason.unrine@uky.edu](mailto:jason.unrine@uky.edu)

### Supplementary Information

#### Tables

**Table S1** pH of 25 mg Zn L<sup>-1</sup> as ZnO NPs in particle free soil solution (PFSS), deionized (DI) water and moderately hard reconstituted water (MHRW) at 0, 25, and 100 mg C L<sup>-1</sup>

| Medium   | PPHA<br>(mg C L <sup>-1</sup> ) | Bare ZnO    | Core-shell<br>pH | DEX         | DEX-(SO <sub>4</sub> ) |
|----------|---------------------------------|-------------|------------------|-------------|------------------------|
| DI       | 0                               | 6.67 ± 0.01 | 7.38 ± 0.06      | 7.43 ± 0.15 | 7.33 ± 0.05            |
| DI       | 25                              | 8.43 ± 0.06 | 7.67 ± 0.21      | 8.30 ± 0.10 | 7.74 ± 0.06            |
| DI       | 100                             | 9.10 ± 0.06 | 8.52 ± 0.12      | 8.92 ± 0.14 | 8.89 ± 0.03            |
| MHRW     | 0                               | 6.65 ± 0.06 | 6.93 ± 0.06      | 6.93 ± 0.05 | 6.72 ± 0.15            |
| MHRW     | 25                              | 7.18 ± 0.06 | 7.18 ± 0.04      | 7.30 ± 0.01 | 7.07 ± 0.01            |
| MHRW     | 100                             | 8.08 ± 0.18 | 8.06 ± 0.12      | 8.01 ± 0.10 | 8.02 ± 0.13            |
| PFSS pH6 | -                               | 6.23 ± 0.04 | 6.12 ± 0.12      | 6.48 ± 0.08 | 6.42 ± 0.07            |
| PFSS pH8 | -                               | 8.00 ± 0.05 | 7.84 ± 0.06      | 7.97 ± 0.09 | 7.90 ± 0.12            |

**Table S2** Sorption isotherm parameters for ZnO NPs and dissolved organic carbon (DOC) sorption studies

| ZnO NP treatment      | r <sup>2</sup> | P at α=0.05 | K<br>(mg <sup>(1-1/n)</sup> .<br>g <sup>-1</sup> .L <sup>(1/n)</sup> ) | n    | 1/n   |
|-----------------------|----------------|-------------|------------------------------------------------------------------------|------|-------|
| Bare-ZnO              | 0.971          | 0.0021      | 0.054                                                                  | 2.31 | 0.433 |
| Core-shell            | 0.993          | 0.0003      | 0.041                                                                  | 1.94 | 0.515 |
| DEX                   | 0.981          | 0.0011      | 0.052                                                                  | 1.73 | 0.577 |
| DEX(SO <sub>4</sub> ) | 0.960          | 0.0035      | 0.054                                                                  | 2.90 | 0.345 |

**Table S3** Selected chemical properties of the Sadler surface soil

|                | Na                     | Ca  | Mg    | K   | Al    | Fe  | Zn  | P   |
|----------------|------------------------|-----|-------|-----|-------|-----|-----|-----|
|                | (mg kg <sup>-1</sup> ) |     |       |     |       |     |     |     |
| Acid leachable | NA                     | 776 | 2,223 | 763 | 1,809 | NA  | 32  | 287 |
| Exchangeable   | 23                     | 766 | 173   | 35  | 37    | NM  | NM  | NM  |
| Mehlich III    | NA                     | 841 | 136   | 47  | 907   | 147 | 0.3 | 2.5 |

NM: Not measured

NA: Not available

**Table S4** Soil solution chemical properties at pH 6 and 8.

| Soil<br>pH | Cations<br>(mg L <sup>-1</sup> ) |     |     |       |       |       | Anions<br>(mg L <sup>-1</sup> ) |    |                 | IS<br>(M) | DOC<br>(mg C<br>L <sup>-1</sup> ) |
|------------|----------------------------------|-----|-----|-------|-------|-------|---------------------------------|----|-----------------|-----------|-----------------------------------|
|            | Na                               | K   | Ca  | Mg    | Al    | Fe    | F                               | Cl | SO <sub>4</sub> |           |                                   |
| 6          | 403                              | 508 | 659 | 817   | 4,842 | 3,870 | 3                               | 11 | 27.8            | 0.9       | 125                               |
| 8          | 350                              | 430 | 907 | 1,894 | 4,364 | 3,543 | 7                               | 20 | 36              | 1.2       | 237                               |

## Figures

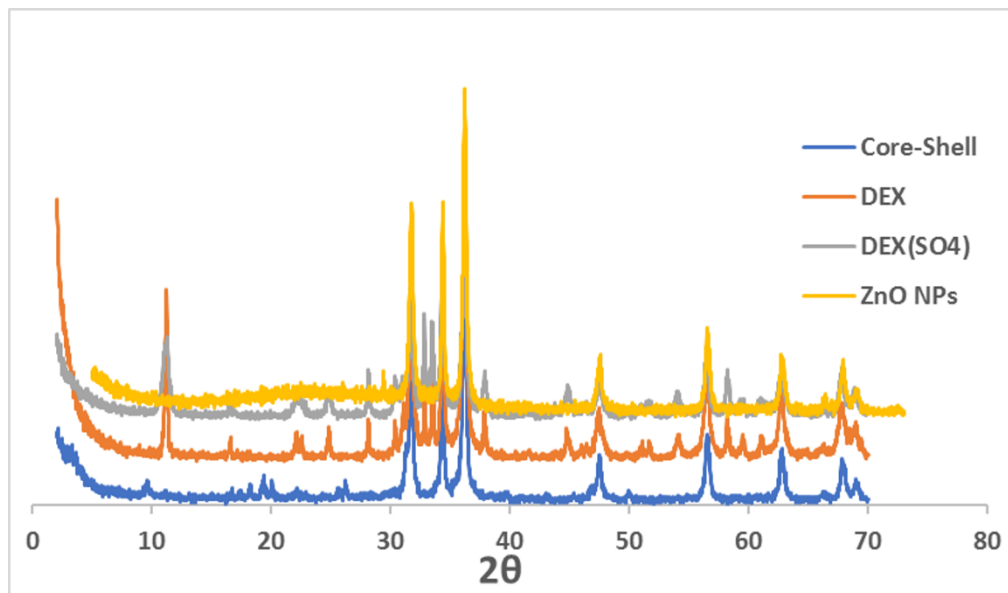**Fig. S1** X-ray diffractograms of core-shell, DEX, and DEX(SO<sub>4</sub>) coated and bare ZnO NPs. Note additional crystal phases present in DEX and DEX(SO<sub>4</sub>), likely from crystallized dextran.

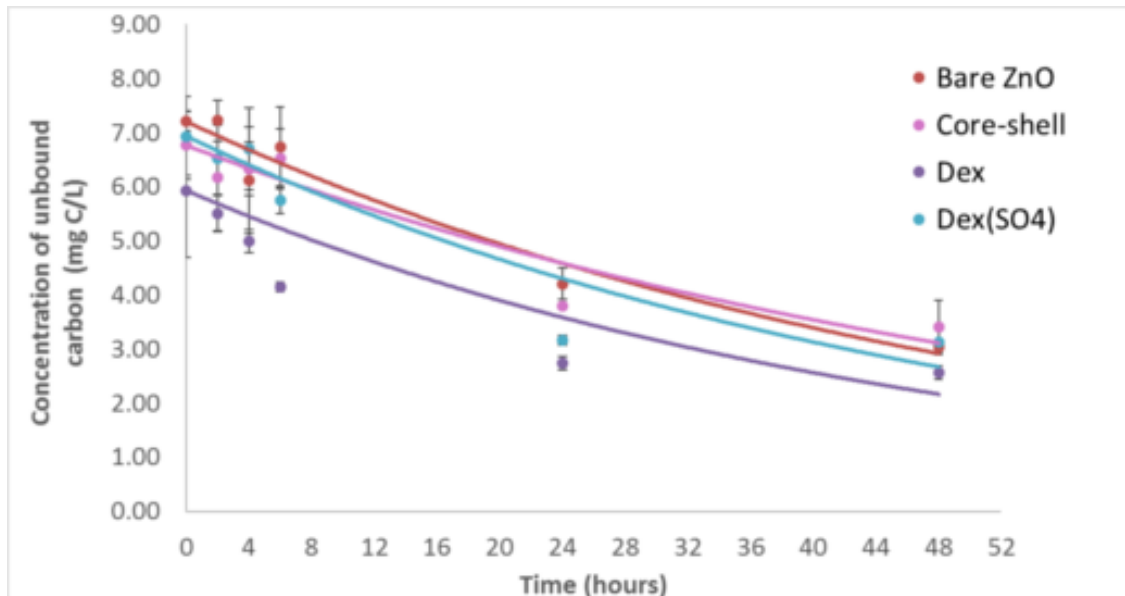

**Fig. S2** Equilibrium time reached after 24 h incubation period in batch sorption isotherms experiments, each point is the average of three independent replicates. Error bars represent  $\pm$  one standard deviation.

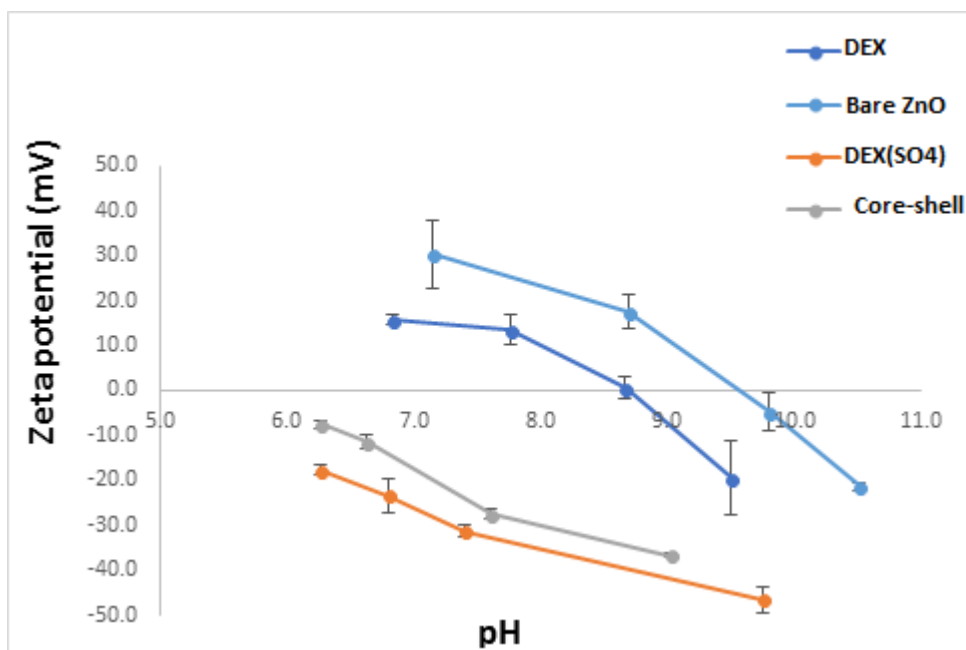

**Fig. S3** Electrophoretic mobility of bare ZnO, dextran coated, (DEX-ZnO), ZnO-Zn<sub>3</sub>(PO<sub>4</sub>)<sub>2</sub> (core-shell), and dextran sulfate coated (DEX(SO<sub>4</sub>)-ZnO NPs as a function of pH in deionized (DI) water. Zn concentration was 100 mg L<sup>-1</sup> for all the tested suspensions.

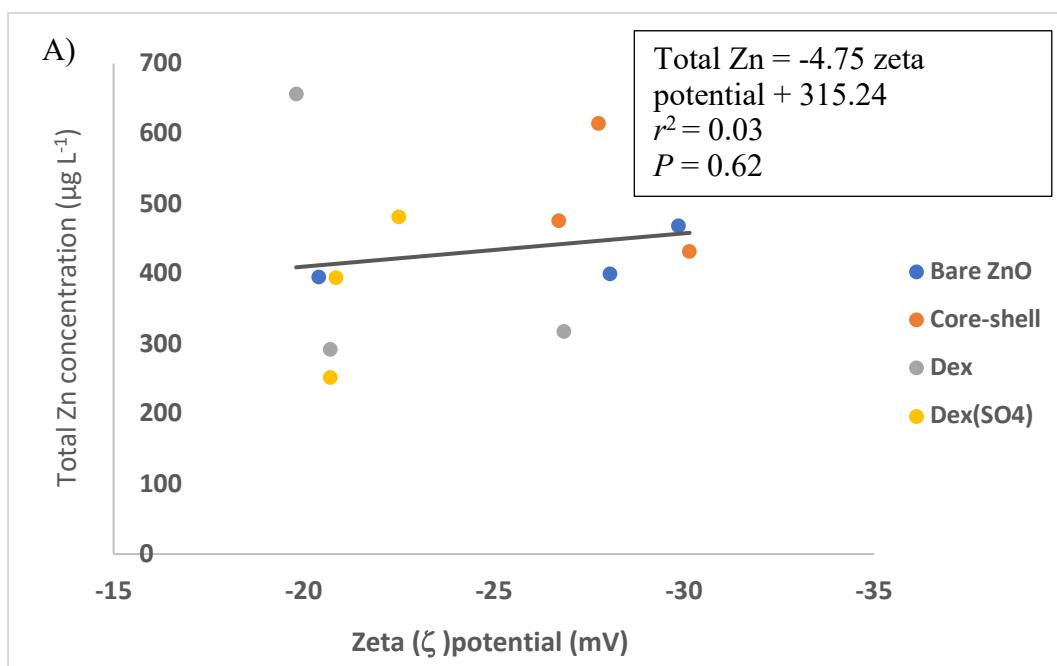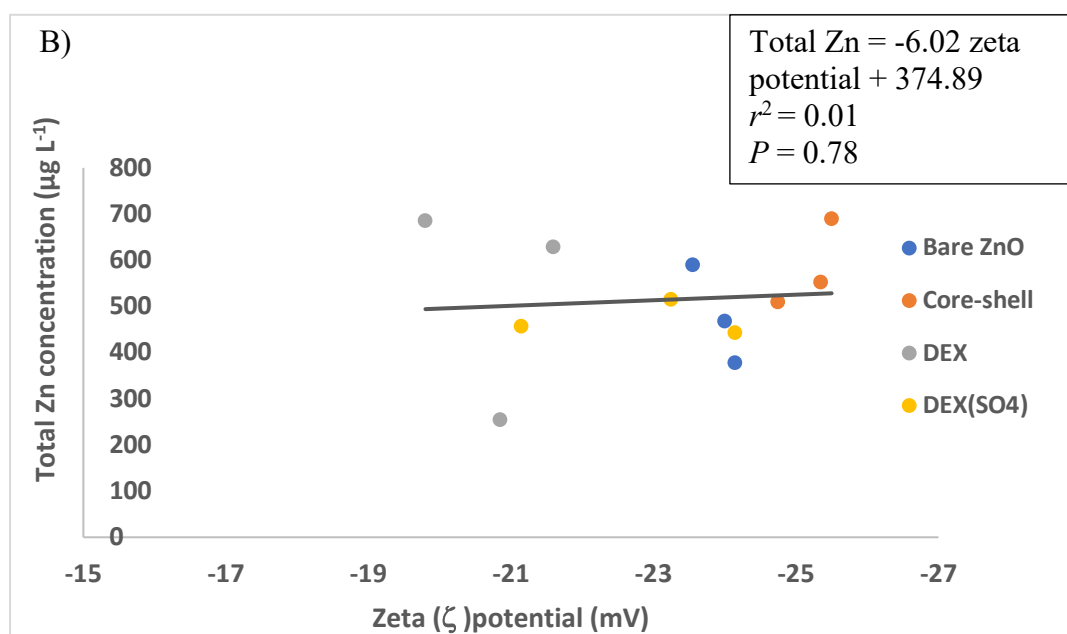

**Fig. S4** Linear regression between zeta potential and total Zn in soil solution at pH 6 (A), and pH 8 (B). Inserts: regression equation,  $r^2$ , and significance of the model ( $p$ ) at  $\alpha=0.05$
